# Supplementary material
Source: publisher figshare collection journal article supplement (https://adisjournals.figshare.com/articles/dataset/_/13376882)
Supplement: Supplementary file 1 [file 1]

# Translating iGlarLixi Evidence for the Management of Frequent Clinical Scenarios in Type 2 Diabetes

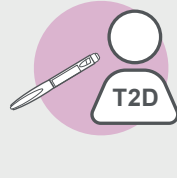

## Authors:

Neil Skolnik, MD,<sup>1</sup> Stefano Del Prato, MD,<sup>2</sup> Lawrence Blonde, MD,<sup>3</sup> Gagik Galstyan, MD,<sup>4</sup> Julio Rosenstock, MD,<sup>5</sup>

## Affiliations:

<sup>1</sup>Sidney Kimmel Medical College, Thomas Jefferson University, Abington Jefferson Health, Abington, PA, USA; <sup>2</sup>Abington Hospital – Jefferson Health, Abington, PA, USA; <sup>3</sup>Department of Clinical & Experimental Medicine, University of Pisa, Pisa, Italy; <sup>4</sup>Frank Riddick Diabetes Institute, Department of Endocrinology, Ochsner Medical Center, New Orleans, LA, USA; <sup>5</sup>Diabetic Foot Department, Endocrinology Research Center, Moscow, Russia; <sup>6</sup>Dallas Diabetes Research Center at Medical City, Dallas, TX, USA

## Introduction

## Clinical profiles

## Conclusions

## Introduction

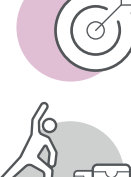

**iGlarLixi** is a once-daily titratable fixed-ratio combination (FRC) of basal insulin glargine 100 U/mL (iGlar) and the GLP-1 RA, Lixi (lixisenatide) for the treatment of people with type 2 diabetes (T2D)

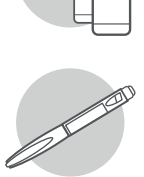

**iGlarLixi** can provide improved glycemic control versus its individual components in a range of patients with T2D

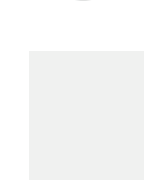

**iGlarLixi** can be a first injectable as an adjunct to diet and exercise alongside metformin with or without SGLT2i

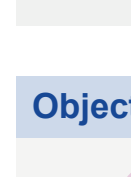

Or for advancing from basal insulin or GLP-1 RA therapy

While the cases presented here are fictional and not real case reviews, they are representative of typical clinical profiles of people with T2D

## Objective

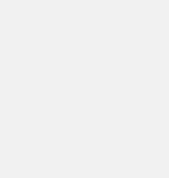

The purpose of this review is to help clinicians understand treatment intensification using **iGlarLixi** in people with T2D by presenting four fictional but typical clinical scenarios supported by research evidence

## Clinical profiles

### Michael

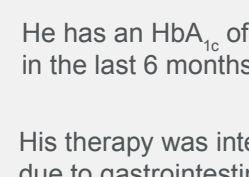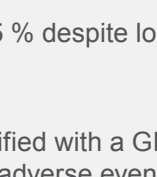

**HbA<sub>1c</sub> 8.5 %**

Age: **60 years** Diabetes duration: **12 years** BMI: **32 kg/m<sup>2</sup>**

## Case history

- Michael has hypertension and dyslipidemia controlled with therapy
- He has an HbA<sub>1c</sub> of 8.5 % despite losing 3 kg through diet and exercise in the last 6 months
- His therapy was intensified with a GLP-1 RA previously, but this was halted due to gastrointestinal adverse events (GI AEs)
- Due to his elevated cardiovascular risk and renal impairment, Michael's clinician has started him on a fixed-dose combination of SGLT2i (empagliflozin) and DPP-4i (linagliptin), which has reduced his HbA<sub>1c</sub>, however, it still fluctuates between 7.6 % and 7.9 %
- He recognizes his HbA<sub>1c</sub> is greater than his target of ≤7 %; however:
  - He is reluctant to start basal insulin due to concerns about weight gain
  - He is concerned about reinitiating a GLP-1 RA due to GI AEs he experienced previously

## Research evidence

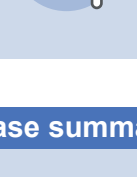

In the LixiLan-O trial, iGlarLixi provided improved HbA<sub>1c</sub> reductions versus iGlar or Lixi alone in people with T2D previously treated with oral antihyperglycemic drugs (OADs) without weight gain or increased hypoglycemia compared with iGlar<sup>1</sup>

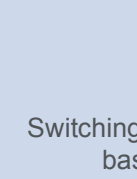

Post hoc analyses of the LixiLan-G trial also show that iGlarLixi provides comparable efficacy and safety regardless of SGLT2i use<sup>2</sup>

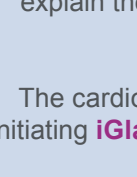

iGlarLixi, being an FRC, enables the Lixi dose to be gradually increased as the iGlar component is titrated, thus increasing gastrointestinal tolerance<sup>1</sup>

## Case summary

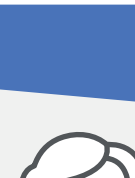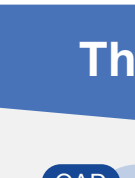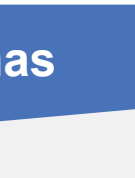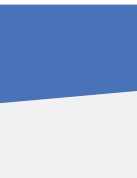

Switching Michael to **iGlarLixi** may help improve glycemic control compared with initiating basal insulin alone, with efficacy and safety being unaffected by SGLT2i use

Michael's clinician can help allay Michael's concerns by using shared decision making to explain the reduced risk of weight gain and GI AEs associated with **iGlarLixi** versus basal insulin or GLP-1 RA, respectively

The cardiovascular and renal-protective benefits of SGLT2i therapy can be continued after initiating **iGlarLixi** by stopping his fixed-dose combination of SGLT2i and DPP-4i and switching him to a fixed-dose combination of metformin + SGLT2i

As Michael has no history of insulin therapy he should be initiated on the recommended starting dose for insulin-naïve individuals.<sup>3,4</sup> His dose should be titrated weekly to reach his individualized fasting SMPG while avoiding hypoglycemia

### Thomas

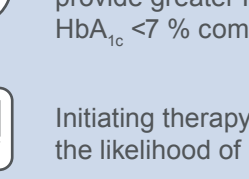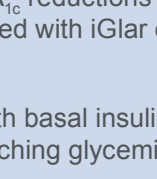

**HbA<sub>1c</sub> 9.6 %**

Age: **54 years** Diabetes duration: **3 years** BMI: **32 kg/m<sup>2</sup>**

## Case history

- Thomas has hypertension
- Thomas is currently on metformin, an SGLT2i (empagliflozin), and an SU (glimepiride)
- He has been unable to reach his target HbA<sub>1c</sub> of <7 % with OADs alone
- Thomas is aware his HbA<sub>1c</sub> is >2 % above target and he will require treatment intensification

## Research evidence

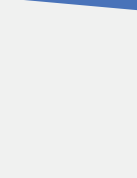

Few people (<25%) with HbA<sub>1c</sub> ≥9 % reach HbA<sub>1c</sub> <7 % within 12 months of initiating therapy with basal insulin or GLP-1 RA alone.<sup>5</sup> iGlarLixi may provide greater HbA<sub>1c</sub> reductions and help more people to reach HbA<sub>1c</sub> <7 % compared with iGlar or Lixi alone<sup>6</sup>

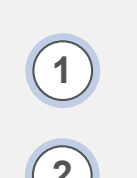

Initiating therapy with basal insulin and GLP-1 RA simultaneously increases the likelihood of reaching glycemic control compared with separate initiation<sup>7</sup>

## Case summary

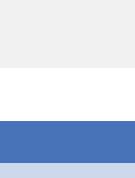

**iGlarLixi** could help Thomas reach his HbA<sub>1c</sub> target more effectively than sequential addition of either GLP-1 RA or basal insulin, particularly given his high HbA<sub>1c</sub>.<sup>6</sup>

Faster achievement of his HbA<sub>1c</sub> target would limit Thomas' cumulative glycemic exposure, potentially reducing cardiovascular disease complications<sup>8</sup>

When intensifying to **iGlarLixi**, Thomas' clinician should continue his metformin in addition to maintaining his SGLT2i therapy for cardiovascular and renal protection, but SU treatment should be discontinued<sup>1</sup>

As Thomas has no history of insulin therapy he should be initiated on the recommended starting dose for insulin-naïve individuals.<sup>3,4</sup> His dose should be titrated weekly to reach his individualized fasting SMPG while avoiding hypoglycemia

### Jane

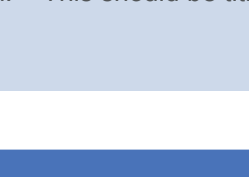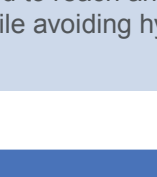

**HbA<sub>1c</sub> 7.9 %**

Age: **58 years** Diabetes duration: **10 years** BMI: **29 kg/m<sup>2</sup>**

## Case history

- Jane has hypertension, hypothyroidism, depression currently controlled on medications, and FPG levels of 100–130 mg/dL
- Other than hypertension, Jane has no atherosclerotic cardiovascular or renal conditions and is currently taking an SGLT2i (dapagliflozin) to help provide continued cardiovascular and renal protection
- Jane has been unable to reach an HbA<sub>1c</sub> of <7 % despite being on iGlar therapy for 2.5 years
- She wishes to avoid the increased self-monitoring, injection requirements, hypoglycemia risk, and weight gain associated with the addition of prandial insulin

## Research evidence

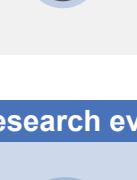

In the LixiLan-L trial, iGlarLixi was shown to help people inadequately controlled on iGlar for over 6 months to reach their HbA<sub>1c</sub> targets without increased risk of hypoglycemia and no increase in body weight<sup>9</sup>

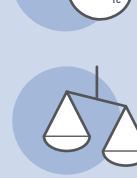

Post hoc analyses of LixiLan-L suggest that iGlarLixi therapy can facilitate more individuals with residual hyperglycemia to reach HbA<sub>1c</sub> <7 % than iGlar alone,<sup>10</sup> through combining the actions of Lixi (primarily targeting PPG)<sup>11</sup> and basal insulin (primarily targeting FPG)<sup>12</sup>

## Case summary

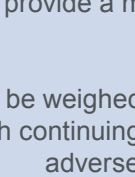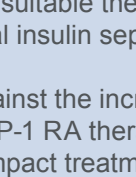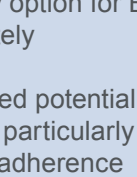

FPG levels of 100–130 mg/dL despite an HbA<sub>1c</sub> of 7.9 % suggest that Jane's elevated HbA<sub>1c</sub> may be driven by increased PPG excursions, for which a once-daily **iGlarLixi** injection would provide a simpler therapy option with less treatment-related burden than a basal bolus regimen

Her SGLT2i therapy will be maintained to help provide continued cardiovascular and renal protection

As Jane is currently receiving 38 U of iGlar daily, her current therapy should be stopped and she should be initiated on 30 U of **iGlarLixi** using a pen containing 100 U iGlar and 33 U Lixi.<sup>3,4</sup> This should be titrated to reach and maintain her individualized fasting SMPG while avoiding hypoglycemia

### Betty

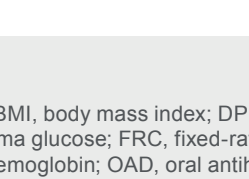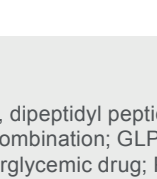

**HbA<sub>1c</sub> 7.9 %**

Age: **58 years** Diabetes duration: **18.2 years** BMI: **29.1 kg/m<sup>2</sup>**

## Case history

- Betty has hypertension
- Betty's treatment was intensified from OADs alone to include a GLP-1 RA (liraglutide) following an HbA<sub>1c</sub> reading of 9.2 %
- Addition of liraglutide helped reduce her HbA<sub>1c</sub> to 7.9 %, but did not enable her to reach her HbA<sub>1c</sub> target of <7 %
- Betty has an eGFR of 66 mL/min/1.73 m<sup>2</sup>, indicating moderately impaired renal function. She has therefore been started on an SGLT2i (canagliflozin) for cardiovascular and renal protection

## Research evidence



Results of the LixiLan-G study showed that switching to iGlarLixi can improve glycemic control compared with continuing previous GLP-1 RA therapy<sup>13</sup>; regardless of diabetes duration, baseline HbA<sub>1c</sub>, or previous GLP-1 RA<sup>14,15</sup>



Incidence and rates of hypoglycemia and GI AEs are low with iGlarLixi but higher than with continued GLP-1 RA therapy<sup>13</sup>

## Case summary



**iGlarLixi** may provide a more suitable therapy option for Betty than adding basal insulin separately

These benefits should be weighed against the increased potential for hypoglycemia and GI AEs compared with continuing GLP-1 RA therapy, particularly as these factors may adversely impact treatment adherence

Her SGLT2i use should be maintained for continued cardiovascular and renal protection

As Betty has no history of insulin therapy, she should be initiated on the dose recommended for insulin-naïve individuals, while stopping her current GLP-1 RA therapy.<sup>3,4</sup> Her dose should be titrated weekly to reach and maintain her individualized fasting SMPG while avoiding hypoglycemia

## Conclusions

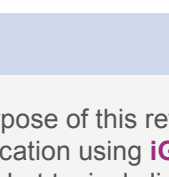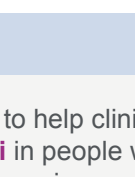

In patients with T2D, the FRC of iGlar and Lixi provides a patient-centric, easy to use treatment approach with robust glucose-lowering efficacy, a low incidence of hypoglycemia, and mitigation of weight gain and nausea compared with separate initiation of basal insulin or GLP-1 RA therapy, respectively

## Abbreviations

BI, basal insulin; BMI, body mass index; DPP-4i, dipeptidyl peptidase-4 inhibitor; eGFR, estimated glomerular filtration rate; FPG, fasting plasma glucose; FRC, fixed-ratio combination; GLP-1 RA, glucagon-like peptide-1 receptor agonist; HbA<sub>1c</sub>, glycated hemoglobin; OAD, oral antihyperglycemic drug; PPG, postprandial plasma glucose; SGLT2i, sodium glucose-like cotransporter-2 inhibitor; SMPG, self-measured plasma glucose; SU, sulfonylurea; T2D, type 2 diabetes

## References

- Rosenstock J, et al. *Diabetes Care*. 2016;39(11):2026–35
- Rosenstock J, et al. *Diabetes*. 2020;69(Suppl 1):88–LB
- Soliqua US Prescribing Information [package insert]. [https://www.accessdata.fda.gov/drugsatfda\\_docs/la\\_bel/2016/208673s000ib1.pdf](https://www.accessdata.fda.gov/drugsatfda_docs/la_bel/2016/208673s000ib1.pdf). Accessed 26 November 2020.
- Soliqua Summary of Product Characteristics [package insert]. <https://www.ema.europa.eu/en/medicines/human/EPAR/soliqua>. Accessed 26 November 2020
- Peng XV, et al. *Diabetes Ther*. 2020;11(11):2629–45
- Davies MJ, et al. *Diabetes Obes Metab*. 2019;21(8):1967–72
- Rosenstock J, et al. *Diabetes Obes Metab*. 2020;1(10)
- Van Wijngaarden RPT, et al. *Diabetes Ther*. 2017;8:1097–109
- Aroda VR, et al. *Diabetes Care*. 2016;39(11):1972–80
- Morea N, et al. *Diabetes Obes Metab*. 2020;22(9):1683–9
- Christensen M, et al. *Expert Opin Drug Discov*. 2014;9(10):1223–51
- Skolnik N, et al. *Clin Diabetes*. 2018;36(2):174–82
- Blonde L, et al. *Diabetes Care*. 2019;42(11):2108–16
- Del Prato S, et al. *Diabetes Care*. 2019;68(Suppl 1):Abstract 1139-P
- Del Prato S, et al. *Diabetologia*. 2019;62(Suppl 1):1–600

This infographic represents the opinions of the authors. For a full list of declarations, including funding and author disclosure statements, please see the full text online. The authors, CC-BY-NC [2020]. Full manuscript
